# Supplementary material
Source: Springer Nature journal article supplement (https://www.springermedizin.de/resource/supplementary/12943_2010_814_MOESM12_ESM.pdf/9554896)

**A**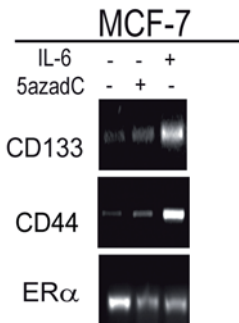**B**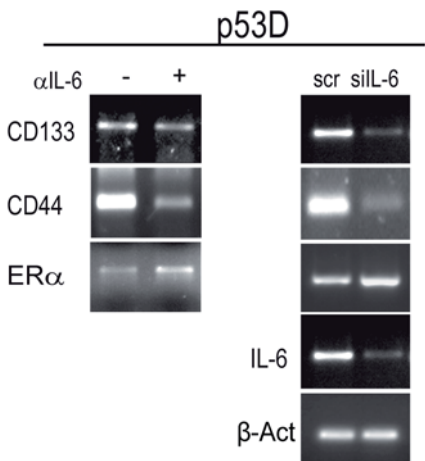**MDA-MB231**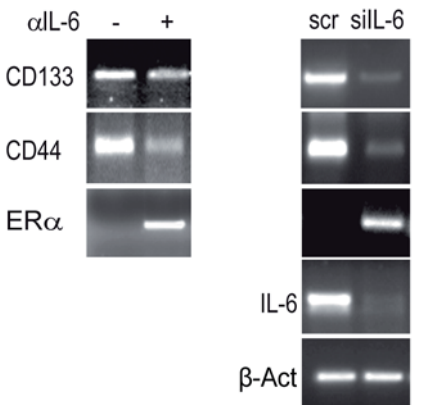

Supplement: MOESM12 [file 9554896]
